# Supplementary material
Source: PubMed Central journal article supplement (PMC7676339)
Supplement: ao0c04470_si_001.pdf [file ao0c04470_si_001.pdf]

## Supporting Information

### Synthesis, Characterization and CO<sub>2</sub> Uptake of Adsorbents Prepared by Hydrothermal Carbonization of Chitosan

José A.O. Chagas,<sup>†</sup> Gustavo O. Crispim,<sup>‡</sup> Bianca P. Pinto,<sup>†,§</sup> Rosane A. S. San Gil,<sup>†,□</sup> Claudio J.A. Mota<sup>†,‡,§,\*</sup>

<sup>†</sup> Universidade Federal do Rio de Janeiro, Instituto de Química, Av. Athos da Silveira Ramos 149, CT Bl A, Cidade Universitária, Rio de Janeiro, RJ, 21941-909, Brazil.

<sup>‡</sup> Universidade Federal do Rio de Janeiro, Escola de Química, Av. Athos da Silveira Ramos 149, CT Bl E, Cidade Universitária, Rio de Janeiro, RJ, 21941-909, Brazil.

<sup>□</sup> Universidade Federal do Rio de Janeiro, Instituto de Pesquisas de Produtos Naturais, 21941-902, RJ, Brazil.

<sup>§</sup> INCT Energia & Ambiente, UFRJ, Rio de Janeiro, RJ, 21941-909, Brazil.

e-mail: cmota@iq.ufrj.br

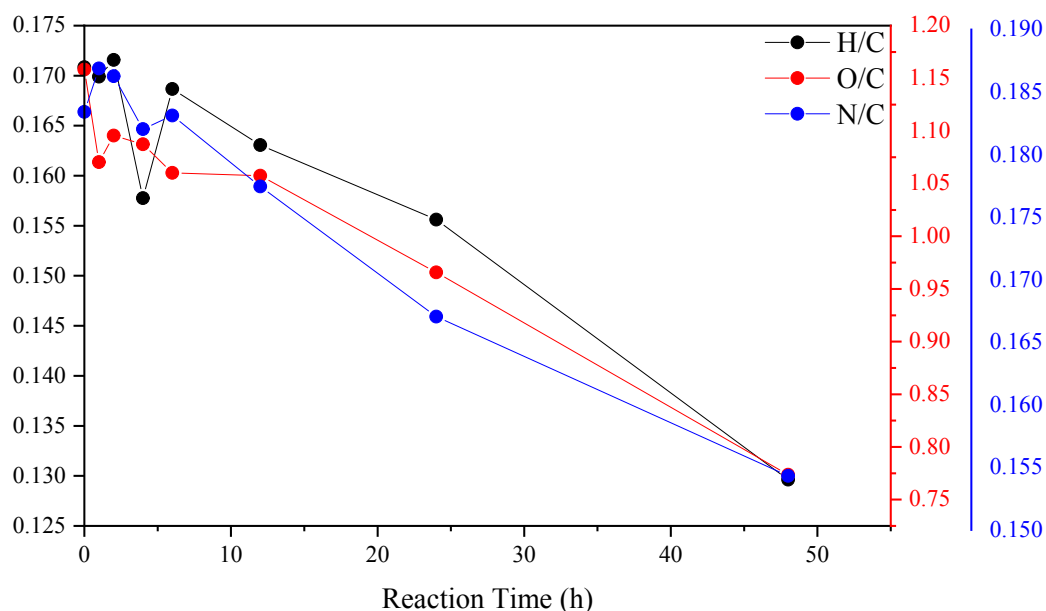

**Figure S1.** H/C, O/C, and N/C atomic ratios of the HTC chitosan materials as a function of treatment time.

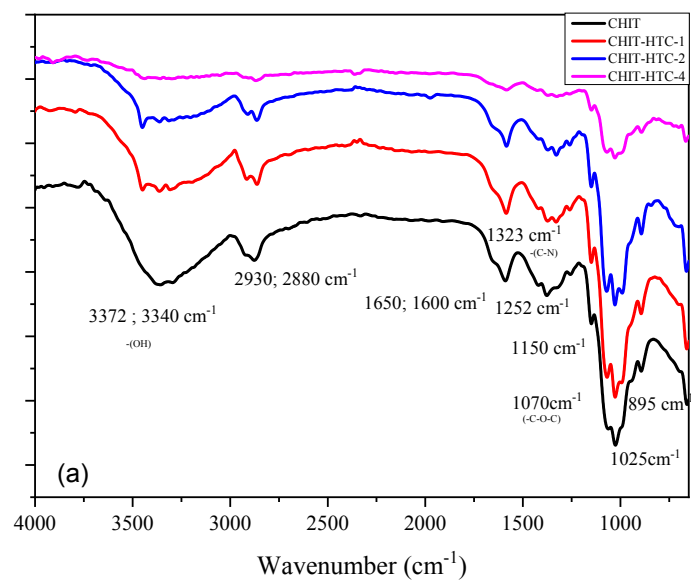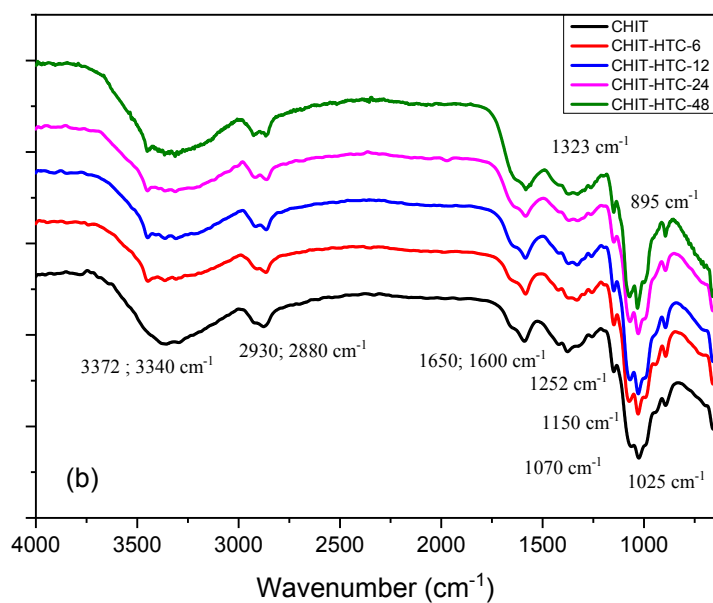

**Figure S2.** FTIR spectra of chitosan and HTC samples **a)** Chitosan, HTC-1, HTC-2, HTC-4 and HTC-6; **b)** Chitosan, HTC-12, HTC-24, HTC-48.

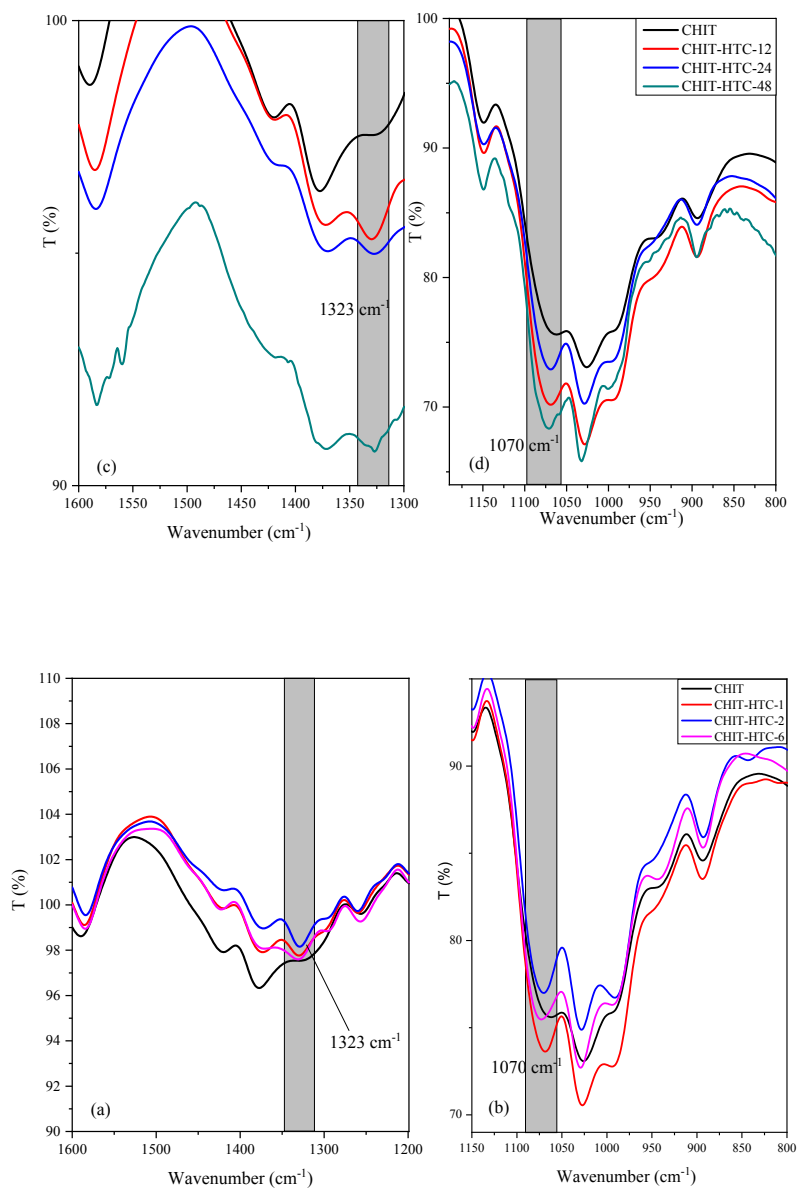

**Figure S3.** Amplification of the regions in the FTIR spectra of chitosan and HTC samples: 1600-1200 cm<sup>-1</sup> (a) and 1150-800 cm<sup>-1</sup>(b).

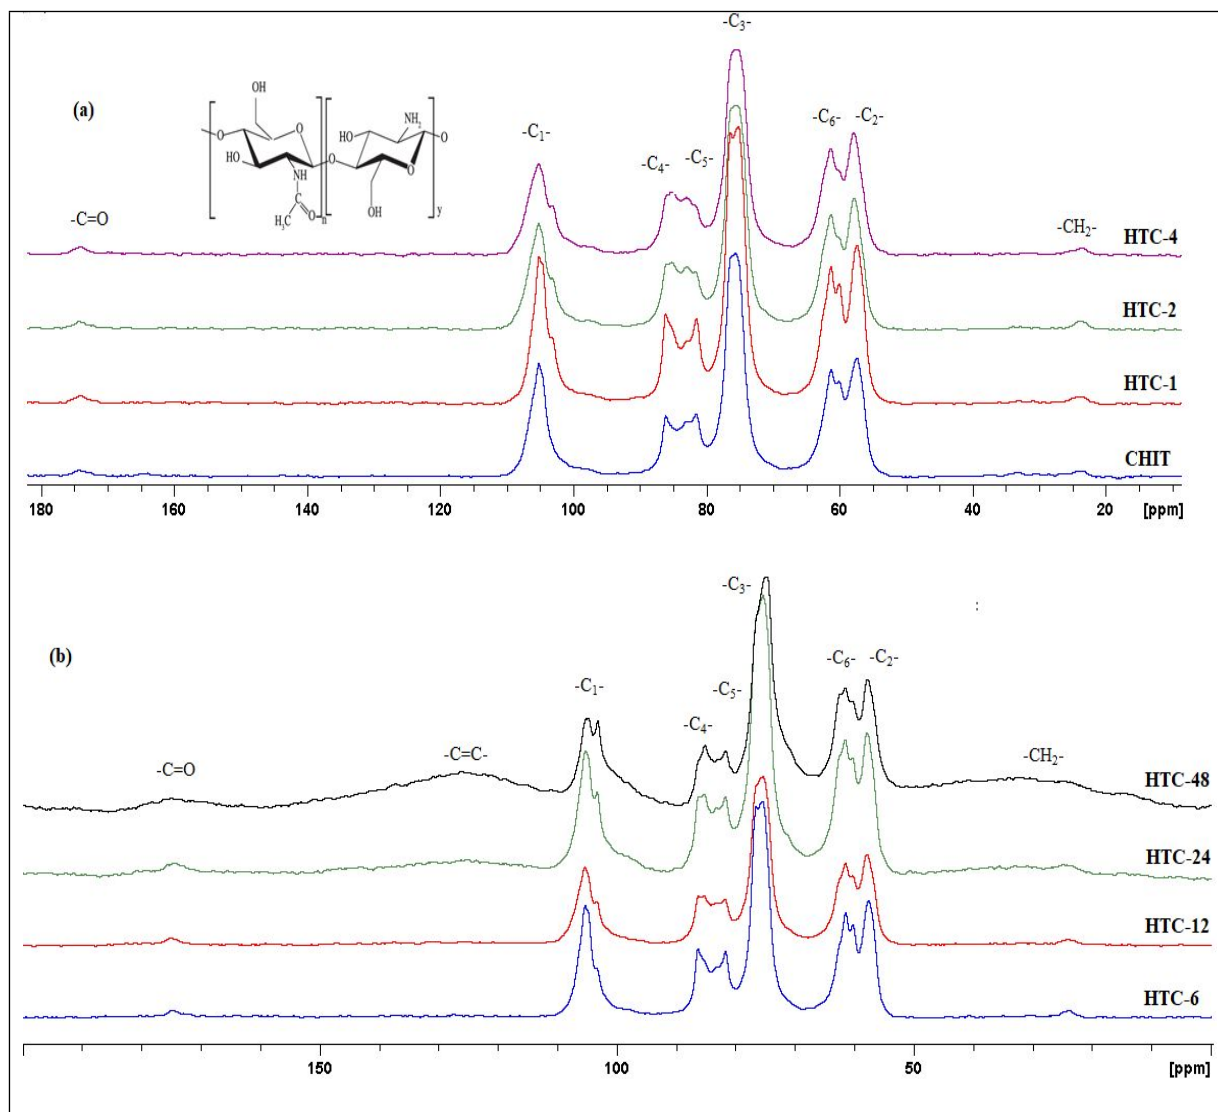

**Figure S4.**  $^{13}\text{C}$  CP-MAS/NMR spectra of (a) Chitosan, CHIT-HTC-1, CHIT-HTC-2, CHIT-HTC-4 and (b) CHIT-HTC-6, CHIT-HTC-12, CHIT-HTC-24, and CHIT-HTC-48.

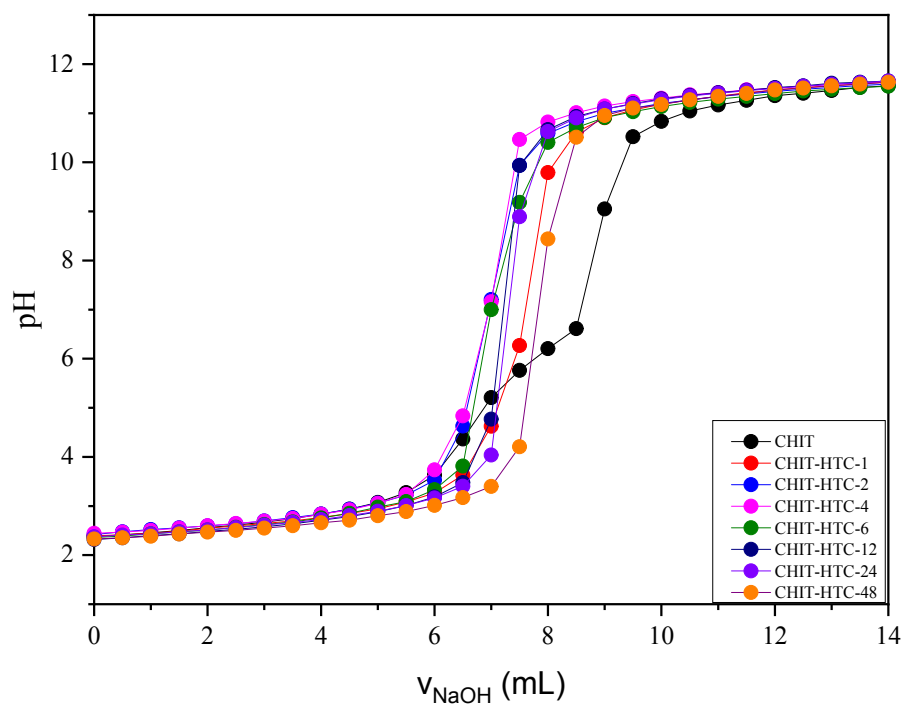

**Figure S5.** Potentiometric titration curves of chitosan and HTC samples.

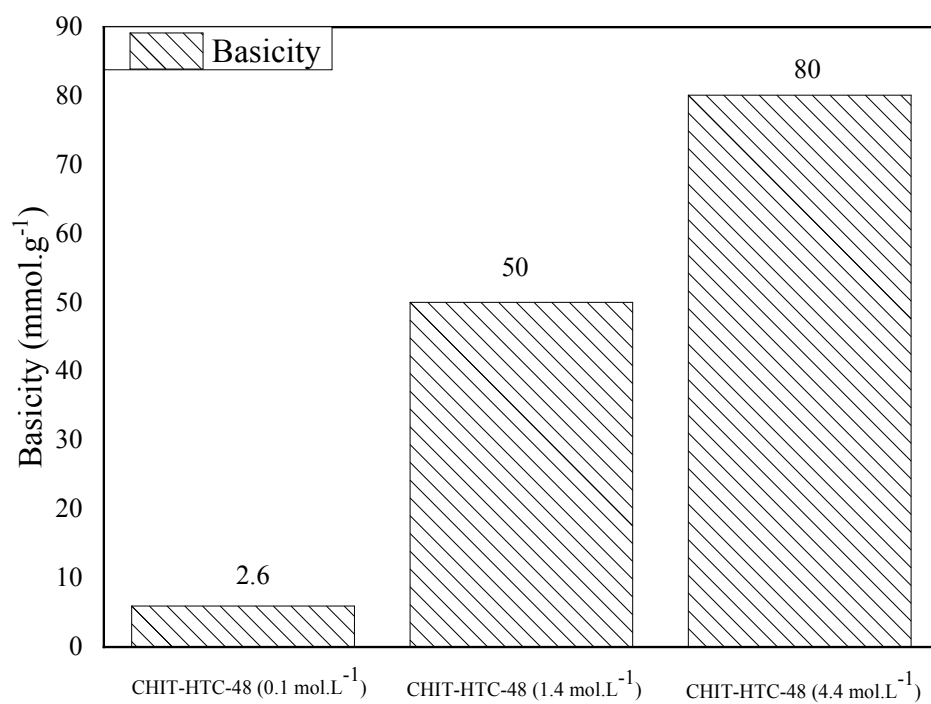

**Figure S6.** Basicity of the CHIT-HTC-48 material with different HCl concentrations.

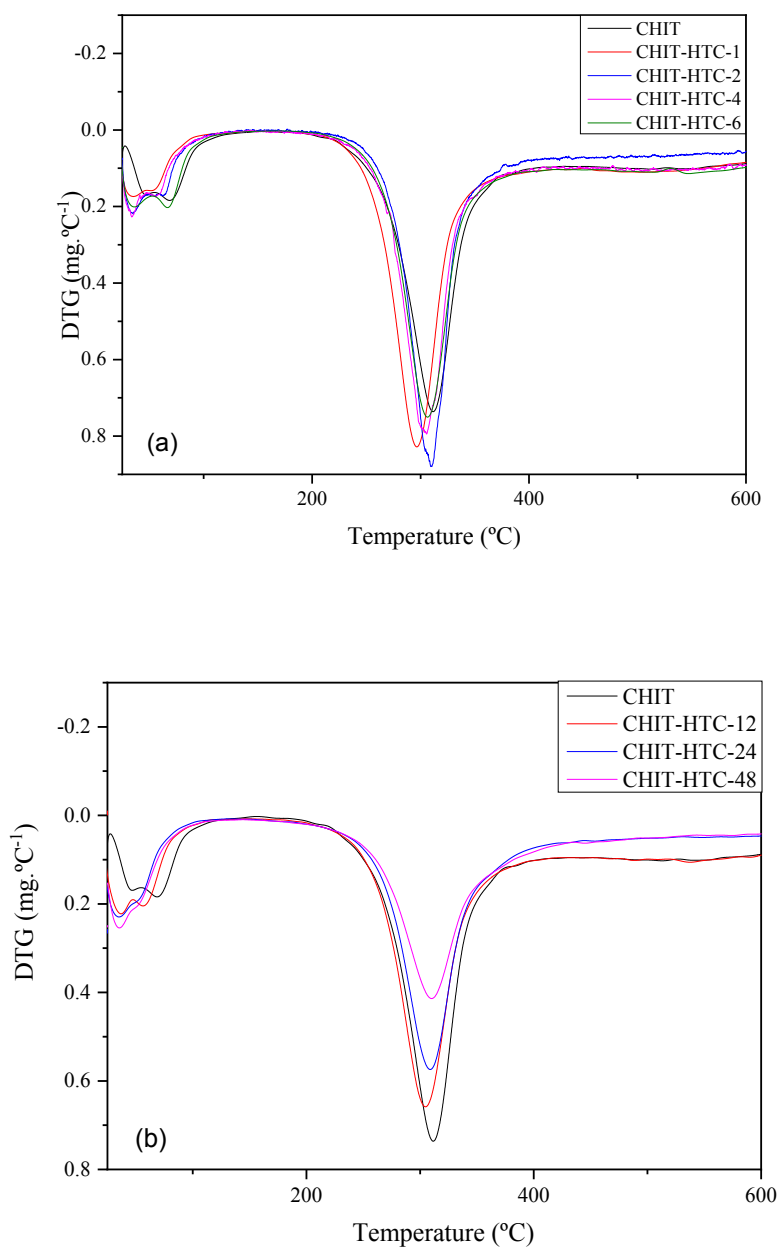

**Figure S7.** DTG curves: a) Chitosan, CHIT-HTC-1, CHIT-HTC-2, CHIT-HTC-4, CHIT-HTC-6; b) Chitosan, CHIT-HTC-12, CHIT-HTC-24, CHIT-HTC-48.

**Table S1.** Weight loss and temperature correspond to the maximum loss in each step for chitosan and HTC samples.

| <b>Sample</b>      | <b>Weight Loss (%)</b> |                    |
|--------------------|------------------------|--------------------|
|                    | <b>First Step</b>      | <b>Second Step</b> |
| <b>CHIT</b>        | 10.0                   | 47.0               |
| <b>CHIT-HTC-1</b>  | 9.0                    | 50.0               |
| <b>CHIT-HTC-2</b>  | 10.5                   | 45.2               |
| <b>CHIT-HTC-4</b>  | 10.3                   | 46.4               |
| <b>CHIT-HTC-6</b>  | 12.0                   | 45.8               |
| <b>CHIT-HTC-12</b> | 12.0                   | 44.2               |
| <b>CHIT-HTC-24</b> | 12.2                   | 38.0               |
| <b>CHIT-HTC-48</b> | 13.2                   | 31.1               |



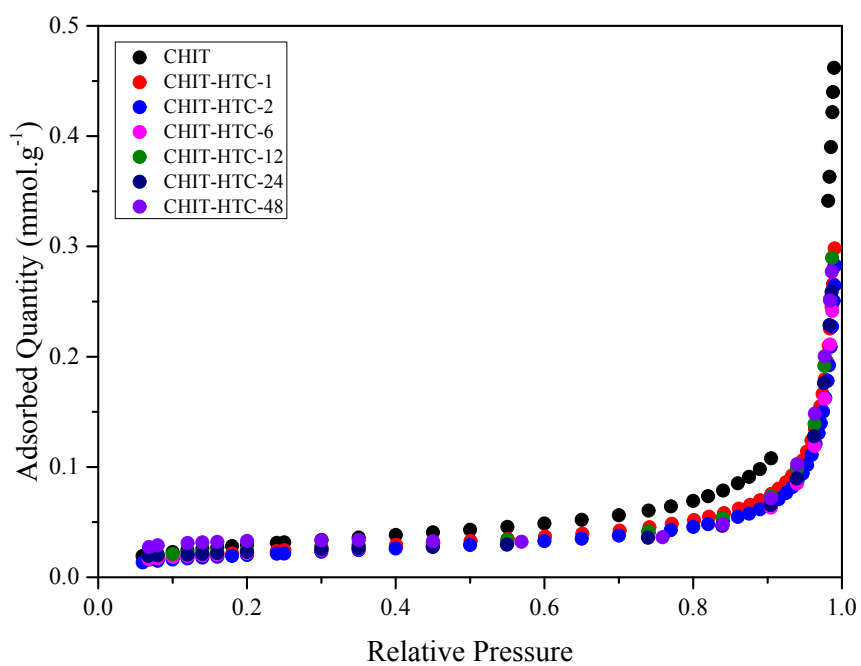

**Figure S8.** Nitrogen adsorption isotherms of chitosan and the HTC materials.

**Table S2.** Textural Properties of the HTC samples.

| <b>Sample</b>      | <b>BET Area (m<sup>2</sup>.g<sup>-1</sup>)</b> |
|--------------------|------------------------------------------------|
| <b>CHIT</b>        | 2.2                                            |
| <b>CHIT-HTC-1</b>  | 1.9                                            |
| <b>CHIT-HTC-2</b>  | 1.7                                            |
| <b>CHIT-HTC-6</b>  | 2.0                                            |
| <b>CHIT-HTC-12</b> | 2.0                                            |
| <b>CHIT-HTC-24</b> | 1.8                                            |
| <b>CHIT-HTC-48</b> | 2.6                                            |
